# Supplementary material for: Ongoing Phenotypic and Genomic Changes in Experimental Coevolution of RNA Bacteriophage Qβ and Escherichia coli
Source: PubMed Central journal article supplement (PMC3150450; doi:10.1371/journal.pgen.1002188), 2011-08-04

A

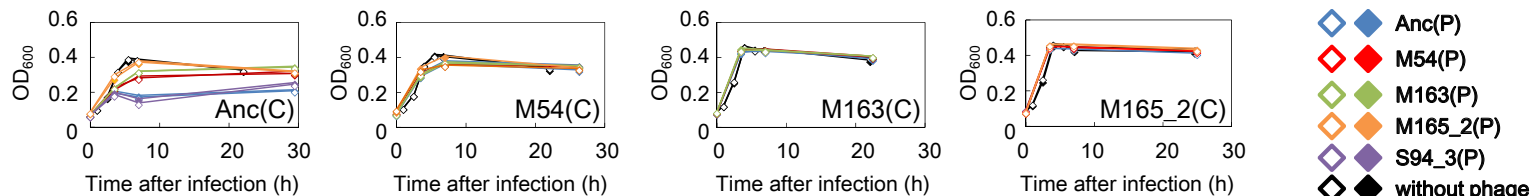

B

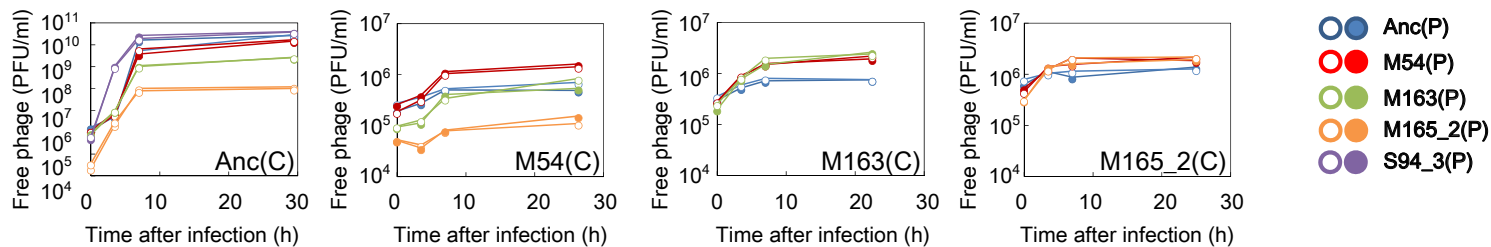

Supplement: pgen.1002188.s001.pdf [file pgen.1002188.s001.pdf]
